# Supplementary material
Source: Springer Nature journal article supplement (https://www.springermedizin.de/resource/supplementary/12889_2014_7145_MOESM5_ESM.pdf/9496912)

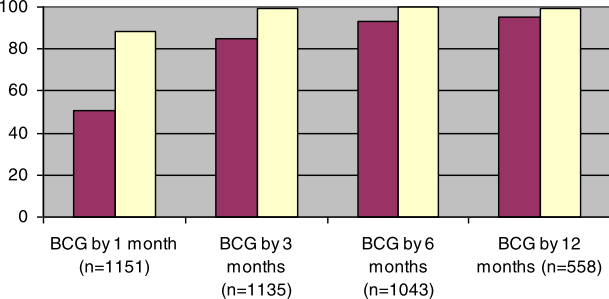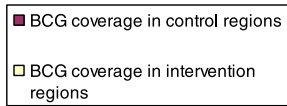

Supplement: MOESM5 [file 9496912]
